# Supplementary material for: Experimental evolution reveals that sperm competition intensity selects for longer, more costly sperm
Source: PubMed Central journal article supplement (PMC6089504; doi:10.1002/evl3.13), 2017-06-07
Supplement: EVL3-1-102-s002.pdf [file EVL3-1-102-s002.pdf]

Independent  
lines

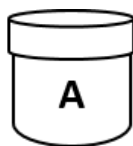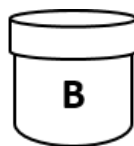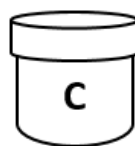

Within  
population  
cross

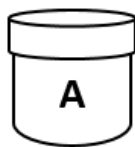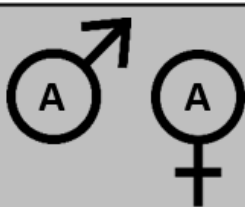

$n = 17$   $n = 17$

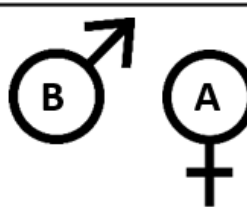

$n = 17$   $n = 15$

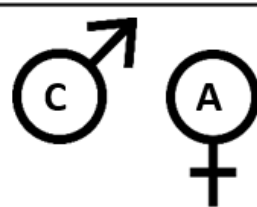

$n = 15$   $n = 14$

Between  
population  
cross

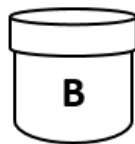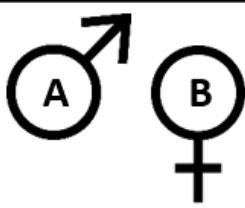

$n = 13$   $n = 16$

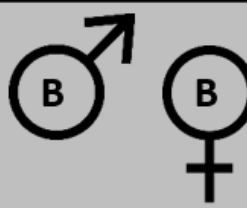

$n = 15$   $n = 17$

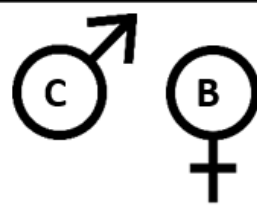

$n = 15$   $n = 16$

Female-biased  
relaxed sperm  
competition

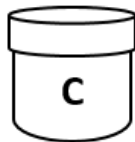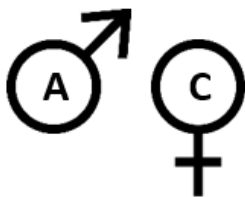

$n = 16$   $n = 16$

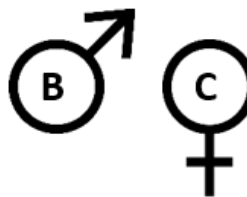

$n = 14$   $n = 15$

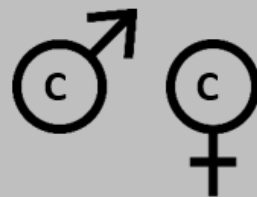

$n = 17$   $n = 17$

Male-biased  
intense sperm  
competition
