# Supplementary material for: Experimental evolution reveals that sperm competition intensity selects for longer, more costly sperm
Source: PubMed Central journal article supplement (PMC6089504; doi:10.1002/evl3.13), 2017-06-07

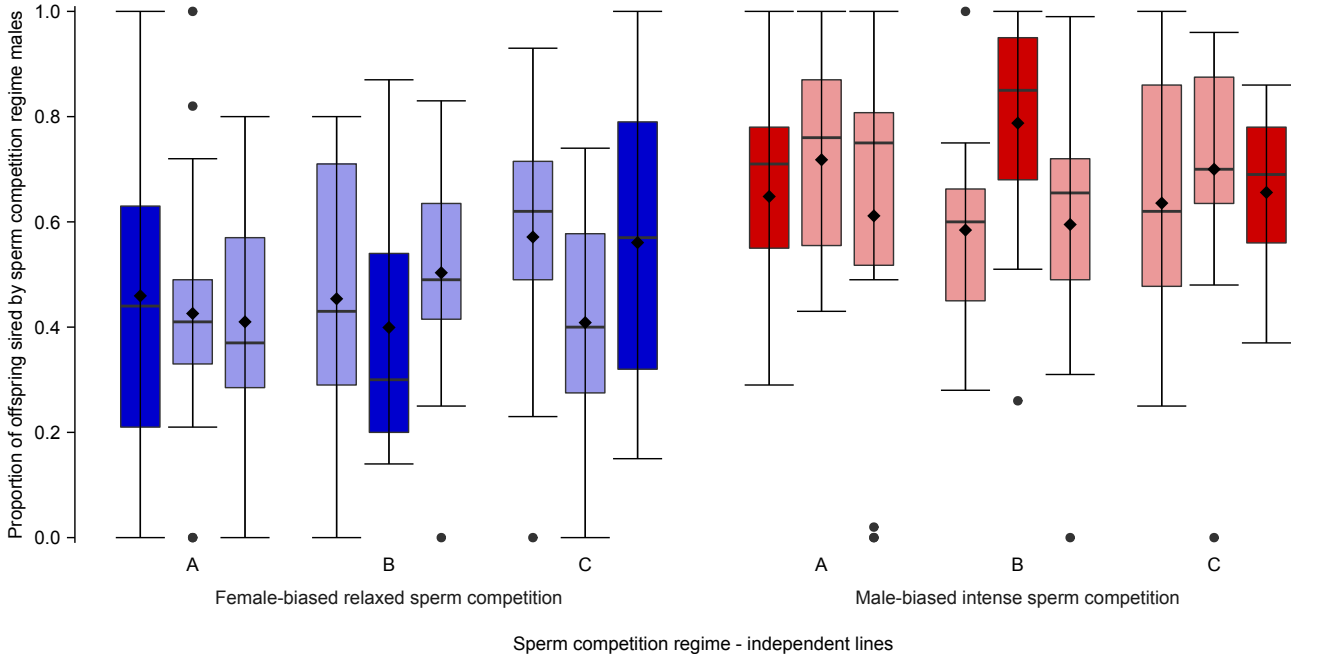

Supplement: EVL3-1-102-s003.pdf [file EVL3-1-102-s003.pdf]
